# Supplementary material for: Effect of Beeswax Coating on the Quality of Eggplant Fruit During Cold Storage and Optimization of Coating Conditions
Source: Hindawi journal article supplement (doi:10.1155/2023/5879085), 2023-04-21
Supplement: f1 [file 5879085.f1.docx]

# **Supplementary Tables**

**Supplementary Table 1:** ANOVA table for reduced quadratic weight loss model of beeswax coating

| Source | Sum of Squares | df | Mean Square | F-value | p-value |
| --- | --- | --- | --- | --- | --- |
| Model | 874.45 | 6 | 145.74 | 20.02 | < 0.0001* |
| X1 | 614.25 | 1 | 614.25 | 84.36 | < 0.0001* |
| X2 | 6.66 | 1 | 6.66 | 0.91 | 0.3614** |
| X3 | 45.13 | 1 | 45.13 | 6.20 | 0.0320* |
| X1X2 | 82.81 | 1 | 82.81 | 11.37 | 0.0071* |
| X1² | 70.79 | 1 | 70.79 | 9.72 | 0.0109* |
| X3² | 47.94 | 1 | 47.94 | 6.58 | 0.0281* |
| Residual | 72.81 | 10 | 7.28 |  |  |
| Lack of Fit | 49.22 | 6 | 8.20 | 1.39 | 0.3909** |
| Pure Error | 23.59 | 4 | 5.90 |  |  |
| Cor Total | 947.26 | 16 |  |  |  |

**Supplementary Table 2:** ANOVA for reduced quadratic firmness model of beeswax coating

| Source | Sum of Squares | df | Mean Square | F-value | p-value |
| --- | --- | --- | --- | --- | --- |
| Model | 11.26 | 7 | 1.61 | 24.42 | < 0.0001* |
| X1 | 0.13 | 1 | 0.13 | 2.01 | 0.1896** |
| X2 | 0.18 | 1 | 0.18 | 2.78 | 0.1299** |
| X3 | 0.43 | 1 | 0.43 | 6.57 | 0.0306* |
| X1X2 | 0.17 | 1 | 0.17 | 2.37 | 0.1582** |
| X1² | 0.69 | 1 | 0.69 | 10.45 | 0.0103* |
| X2² | 5.86 | 1 | 5.86 | 88.90 | < 0.0001* |
| X3² | 2.91 | 1 | 2.91 | 44.22 | < 0.0001* |
| Residual | 0.59 | 9 | 0.07 |  |  |
| Lack of Fit | 0.48 | 5 | 0.10 | 3.41 | 0.1288** |
| Pure Error | 0.11 | 4 | 0.03 |  |  |
| Cor Total | 11.85 | 16 |  |  |  |

**Supplementary Table 3:** ANOVA for reduced quadratic L* value model of beeswax coating

| Source | Sum of Squares | df | Mean Square | F-value | p-value |
| --- | --- | --- | --- | --- | --- |
| Model | 16.57 | 5 | 3.31 | 10.22 | 0.0008* |
| X1 | 3.24 | 1 | 3.24 | 9.99 | 0.0091* |
| X2 | 6.00 | 1 | 6.00 | 18.51 | 0.0012* |
| X3 | 0.07 | 1 | 0.07 | 0.22 | 0.6462** |
| X2² | 2.93 | 1 | 2.93 | 9.02 | 0.0120* |
| X3² | 3.93 | 1 | 3.93 | 12.12 | 0.0051** |
| Residual | 3.57 | 11 | 0.32 |  |  |
| Lack of Fit | 3.23 | 7 | 0.46 | 5.46 | 0.0601** |
| Pure Error | 0.33 | 4 | 0.08 |  |  |
| Cor Total | 20.14 | 16 |  |  |  |

**Supplementary Table 4:** ANOVA for a* value reduced quadratic model for beeswax coating

| Source | Sum of Squares | df | Mean Square | F-value | p-value |
| --- | --- | --- | --- | --- | --- |
| Model | 11.88 | 7 | 1.7 | 43.72 | < 0.0001* |
| X1 | 0.02 | 1 | 0.02 | 0.44 | 0.5233** |
| X2 | 0.001 | 1 | 0.001 | 0.03 | 0.8616** |
| X3 | 0.08 | 1 | 0.08 | 2.11 | 0.18** |
| X1X2 | 7.02 | 1 | 7.02 | 180.93 | < 0.0001* |
| X1² | 1.61 | 1 | 1.61 | 41.6 | 0.0001* |
| X2² | 2.48 | 1 | 2.48 | 63.78 | < 0.0001* |
| X3² | 0.68 | 1 | 0.68 | 17.42 | 0.0024* |
| Residual | 0.35 | 9 | 0.04 |  |  |
| Lack of Fit | 0.29 | 5 | 0.06 | 3.56 | 0.1213** |
| Pure Error | 0.06 | 4 | 0.02 |  |  |
| Cor Total | 12.23 | 16 |  |  |  |

**Supplementary Table 5:** ANOVA for reduced quadratic model of b* value for beeswax coating

| Source | Sum of Squares | df | Mean Square | F-value | p-value |
| --- | --- | --- | --- | --- | --- |
| Model | 135.98 | 8 | 17 | 55.21 | < 0.0001* |
| X1 | 0.62 | 1 | 0.62 | 2.00 | 0.1949** |
| X2 | 18.06 | 1 | 18.06 | 58.67 | < 0.0001* |
| X3 | 6.44 | 1 | 6.44 | 20.93 | 0.0018* |
| X1X2 | 53.8 | 1 | 53.8 | 174.77 | < 0.0001* |
| X1X3 | 3.37 | 1 | 3.37 | 10.94 | 0.0107* |
| X2X3 | 2.91 | 1 | 2.91 | 9.44 | 0.0153* |
| X1² | 10.58 | 1 | 10.58 | 34.37 | 0.0004* |
| X2² | 37.82 | 1 | 37.82 | 122.86 | < 0.0001* |
| Residual | 2.46 | 8 | 0.31 |  |  |
| Lack of Fit | 2.04 | 4 | 0.51 | 4.80 | 0.079** |
| Pure Error | 0.42 | 4 | 0.10 |  |  |
| Cor Total | 138.44 | 16 |  |  |  |

**Supplementary Table 6:** ANOVA for reduced quadratic model of total phenolic content for beeswax coating

| Source | Sum of Squares | df | Mean Square | F-value | p-value |
| --- | --- | --- | --- | --- | --- |
| Model | 2861.51 | 7 | 408.79 | 15.13 | 0.0005* |
| X1 | 0.8567 | 1 | 0.8567 | 0.0317 | 0.8631** |
| X2 | 300.41 | 1 | 300.41 | 11.12 | 0.0103* |
| X3 | 15.89 | 1 | 15.89 | 0.5880 | 0.4652** |
| X1X3 | 569.06 | 1 | 569.06 | 21.06 | 0.0018* |
| X2X3 | 1714.59 | 1 | 1714.59 | 63.46 | < 0.0001* |
| X12 | 398.80 | 1 | 398.80 | 14.76 | 0.0049* |
| X22 | 183.69 | 1 | 183.69 | 6.80 | 0.0313* |
| Residual | 216.15 | 8 | 27.02 |  |  |
| Lack of Fit | 185.74 | 4 | 46.44 | 6.11 | 0.0538** |
| Pure Error | 30.41 | 4 | 7.60 |  |  |
| Cor Total | 3077.66 | 15 |  |  |  |

**Supplementary Table 7:** ANOVA for response surface reduced quadratic model of the ascorbic acid levels of beeswax coating

| Source | Sum of Squares | df | Mean Square | F-value | p-value |
| --- | --- | --- | --- | --- | --- |
| Model | 6655.82 | 5 | 1331.16 | 14.42 | 0.0002* |
| X1 | 814.46 | 1 | 814.46 | 8.82 | 0.0127* |
| X2 | 435.86 | 1 | 435.86 | 4.72 | 0.0525* |
| X3 | 456.47 | 1 | 456.47 | 4.94 | 0.0481* |
| X2X3 | 2957.73 | 1 | 2957.73 | 32.03 | 0.0001* |
| X12 | 1991.30 | 1 | 1991.30 | 21.56 | 0.0007* |
| Residual | 1015.79 | 11 | 92.34 |  |  |
| Lack of Fit | 698.69 | 7 | 99.81 | 1.26 | 0.4352** |
| Pure Error | 317.10 | 4 | 79.28 |  |  |
| Cor Total | 7671.62 | 16 |  |  |  |

**Supplementary Table 8:** ANOVA for response surface reduced quadratic model of the total antioxidant capacity of beeswax coating

| Source | Sum of Squares | df | Mean Square | F-value | p-value |
| --- | --- | --- | --- | --- | --- |
| Model | 880.97 | 6 | 146.83 | 20.90 | < 0.0001* |
| X1 | 3.64 | 1 | 3.64 | 0.5185 | 0.4880** |
| X2 | 85.32 | 1 | 85.32 | 12.14 | 0.0059* |
| X3 | 232.12 | 1 | 232.12 | 33.03 | 0.0002* |
| X1X3 | 144.06 | 1 | 144.06 | 20.50 | 0.0011* |
| X2X3 | 294.46 | 1 | 294.46 | 41.91 | < 0.0001* |
| X12 | 121.37 | 1 | 121.37 | 17.27 | 0.0020* |
| Residual | 70.27 | 10 | 7.03 |  |  |
| Lack of Fit | 59.51 | 6 | 9.92 | 3.69 | 0.1135** |
| Pure Error | 10.75 | 4 | 2.69 |  |  |
| Cor Total | 951.23 | 16 |  |  |  |
